# Supplementary material for: Breast cancer genomes from CHEK2 c.1100delC mutation carriers lack somatic TP53 mutations and display a unique structural variant size distribution profile
Source: Springer Nature journal article supplement (doi:10.1186/s13058-023-01653-0), 2023-05-09
Supplement: MOESM2 [file 25337060]

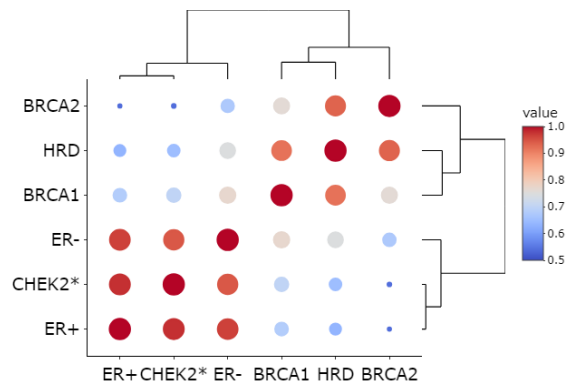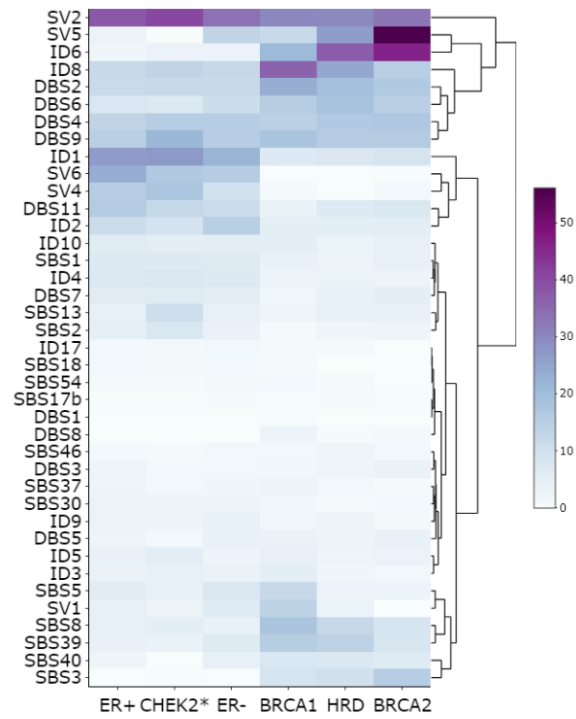

**Figure S1.** Mutational signatures among metastatic BC genomes. Cosine similarity coefficients (top) and hierarchical clustering (bottom) of breast cancer subgroups based on the median relative contribution of 39 SBS, DBS, ID and SV signatures.

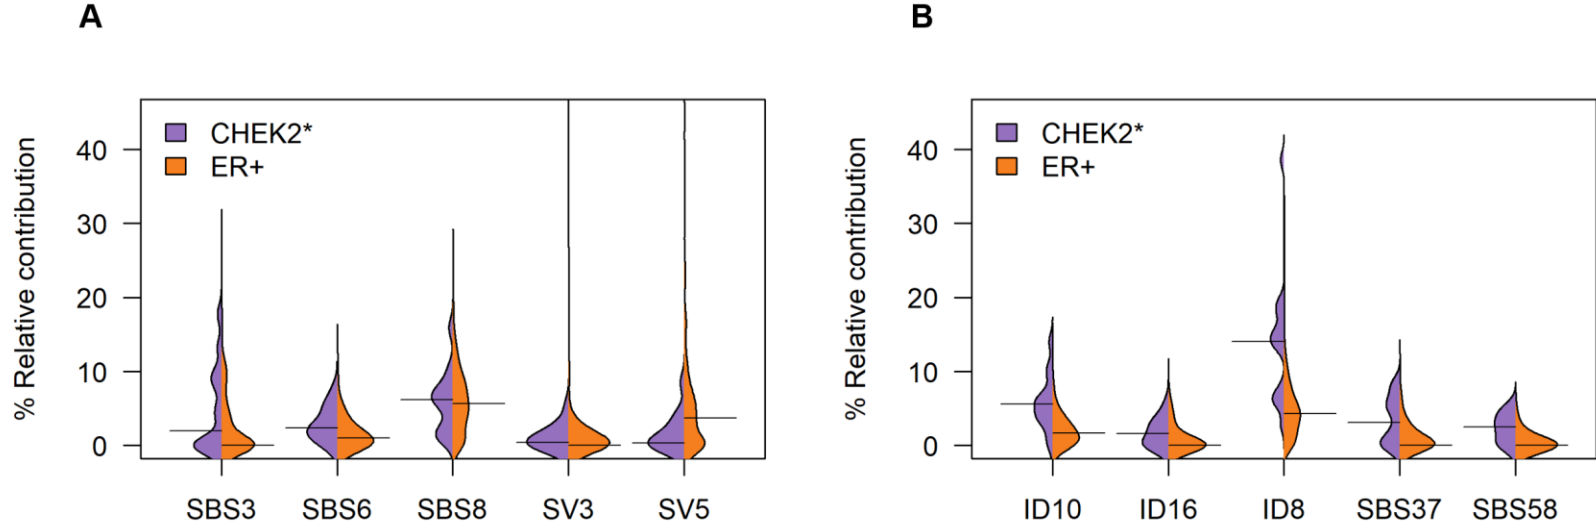

**Figure S2.** Relative contribution of mutational signatures in CHEK2\* and ER+ pBC genomes. **A** HRD-specific signatures. **B** Signatures significantly different between CHEK2\* and ER+ pBCs. Horizontal lines indicate median levels.

**A**

| ENSG-ID         | name       | Coefficient | P-value |
|-----------------|------------|-------------|---------|
| ENSG00000163635 | ATXN7      | 0.3472      | 0.002   |
| ENSG00000149531 | FRG1B      | 0.7715      | 0.021   |
| ENSG00000086848 | ALG9       | 0.3416      | 0.021   |
| ENSG00000163633 | C4orf36    | 0.3889      | 0.026   |
| ENSG00000236824 | BCYRN1     | 0.6915      | 0.028   |
| ENSG00000104728 | ARHGEF10   | 0.4494      | 0.033   |
| ENSG00000110536 | PTPMT1     | -0.3408     | 0.035   |
| ENSG00000108465 | CDK5RAP3   | 0.4819      | 0.040   |
| ENSG00000243646 | IL10RB     | 0.3312      | 0.041   |
| ENSG00000204822 | MRPL53     | -0.3091     | 0.041   |
| ENSG00000144619 | CNTN4      | 1.0656      | 0.043   |
| ENSG00000175691 | ZNF77      | -0.2505     | 0.044   |
| ENSG00000160408 | ST6GALNAC6 | 0.4287      | 0.046   |
| ENSG00000221930 | FAM45B     | 0.3725      | 0.049   |

**B**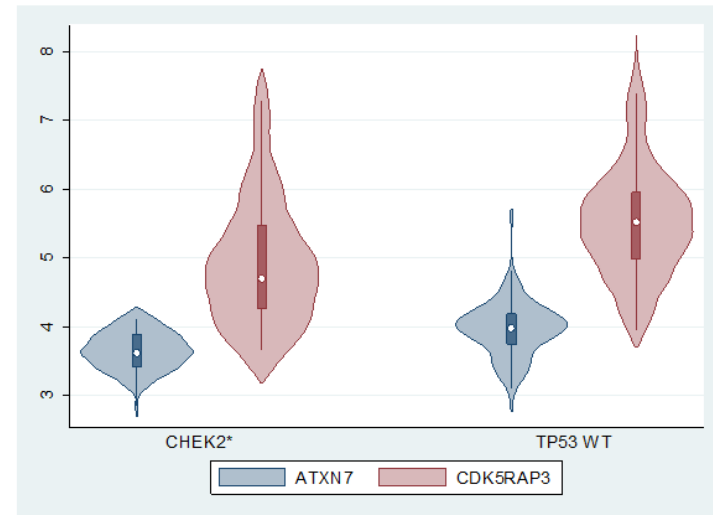

**Figure S3.** Genes differentially expressed between CHEK2\* versus *TP53* wild-type ER+ pBCs. **A** 14 genes that were differentially expressed. **B** Expression levels (log2) of *ATXN7* and *CDK5RAP3* among the two groups. White circles indicate median levels.

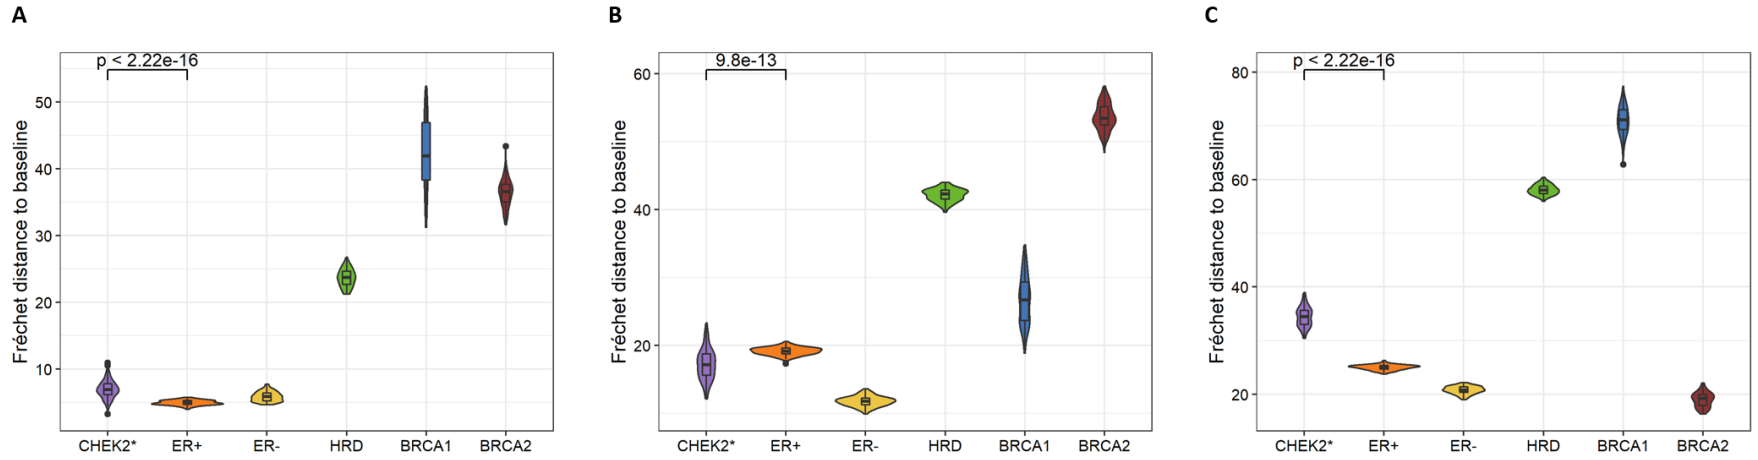

**Figure S4.** Distribution of Fréchet distances among the subgroups of mBC genomes for **A** inversions, **B** deletions and **C** tandem duplications.

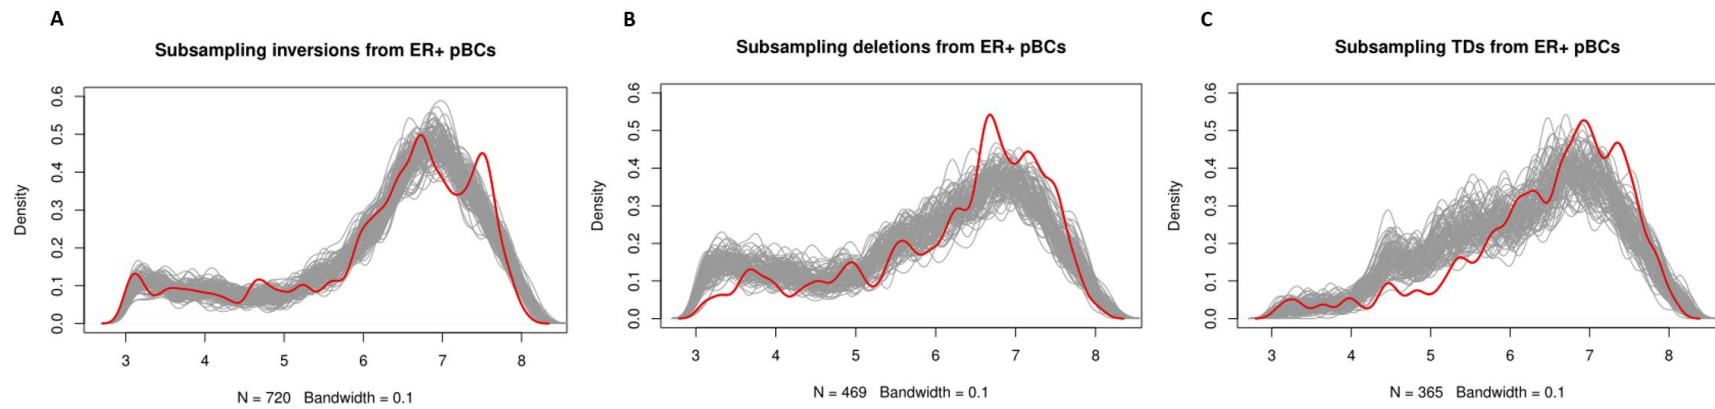

**Figure S5.** Subsampling SVs from ER+ pBC genomes. Grey density curves represent 100 subsampling iterations from ER+ pBCs, whereas the red density curve represents the CHEK2\* pBCs. **A** Inversions, **B** deletions, **C** tandem duplications.
